# Supplementary material for: In Situ Compatibilized Blends of PLA/PCL/CAB Melt-Blown Films with High Elongation: Investigation of Miscibility, Morphology, Crystallinity and Modelling
Source: MDPI journal article supplement (doi:10.3390/polym15020303), 2023-01-06

Table S1. Compositions and tensile property of ternary-blended, melt-blown films of PLA/PCL/CAB samples

| Samples | PLA/PCL/CAB<br>Compositions | % Elongation at break |        | Tensile strength at break |       | Modulus |       |
|---------|-----------------------------|-----------------------|--------|---------------------------|-------|---------|-------|
|         |                             | [MPa]                 |        | [MPa]                     |       | [MPa]   |       |
|         |                             | MD                    | TD     | MD                        | TD    | MD      | TD    |
| 1       | 100PLA                      | 19.44                 | 10.31  | 45.02                     | 44.57 | 2780    | 2800  |
| 2       | 95PLA/5PCL                  | 16.93                 | 14.82  | 50.29                     | 45.23 | 3104    | 3014  |
| 3       | 90PLA/10PCL                 | 26.19                 | 9.88   | 41.59                     | 42.74 | 2848    | 2880  |
| 4       | 80PLA/20PCL                 | 12.71                 | 1.07   | 37.28                     | 11.11 | 2677    | 1968  |
| 5       | 95PLA/5CAB                  | 35.88                 | 10.52  | 52.94                     | 49.78 | 3145    | 3070  |
| 6       | 90PLA/10CAB                 | 13.84                 | 30.86  | 53.89                     | 48.36 | 3157    | 2942  |
| 7       | 80PLA/20CAB                 | 5.44                  | 3.15   | 43.17                     | 58.48 | 2557    | 2590  |
| 8       | 90/5/5                      | 20.03                 | 3.41   | 39.94                     | 41.53 | 1344    | 1471  |
| 9       | 85/10/5                     | 19.04                 | 4.33   | 35.55                     | 32.58 | 2282    | 2366  |
| 10      | 85/5/10                     | 358.73                | 318.81 | 47.42                     | 44.31 | 2452    | 2310  |
| 11      | 80/15/5                     | 26.68                 | 2.98   | 29.83                     | 27.55 | 2263    | 1935  |
| 12      | 80/10/10                    | 4.57                  | 1.82   | 35.45                     | 33.72 | 2107    | 2094  |
| 13      | 80/5/15                     | 279.21                | 288.60 | 38.52                     | 44.18 | 2182    | 2300  |
| 14      | 75/20/5                     | 25.91                 | 1.65   | 26.64                     | 19.26 | 1895    | 1678  |
| 15      | 75/10/15                    | 353.79                | 245.45 | 39.33                     | 36.18 | 2108    | 2162  |
| 16      | 75/15/10                    | 364.08                | 4.61   | 36.53                     | 37.04 | 2163    | 2213  |
| 17      | 75/5/20                     | 3.23                  | 3.02   | 48.72                     | 50.45 | 2112    | 2272  |
| 18      | 70/20/10                    | 2.72                  | 1.87   | 36.23                     | 39.21 | 2334    | 2342  |
| 19      | 70/15/15                    | 391.85                | 7.04   | 44.20                     | 27.43 | 2227    | 2102  |
| 20      | 70/10/20                    | 12.30                 | 1.97   | 32.40                     | 30.09 | 1940    | 1812  |
| 21      | 65/25/10                    | 5.87                  | 0.58   | 8.41                      | 2.42  | 564.8   | 471   |
| 22      | 65/20/15                    | 274.85                | 0.61   | 36.10                     | 9.43  | 2194    | 1715  |
| 23      | 65/15/20                    | 349.49                | 10.65  | 34.89                     | 24.08 | 1812    | 1592  |
| 24      | 65/10/25                    | 196.66                | 186.13 | 42.43                     | 49.84 | 2707    | 2877  |
| 25      | 60/25/15                    | 6.69                  | 0.78   | 22.11                     | 8.68  | 1490    | 1256  |
| 26      | 60/20/20                    | 5.28                  | 1.79   | 29.22                     | 2.16  | 1917    | 422.5 |
| 27      | 60/15/25                    | 395.57                | 9.64   | 44.08                     | 29.98 | 2126    | 2010  |
| 28      | 55/20/25                    | 421.71                | 9.33   | 40.63                     | 18.61 | 1965    | 1202  |
| 29      | 50/25/25                    | 3.10                  | 3.30   | 29.21                     | 23.99 | 1764    | 1634  |
| 30      | 50/20/30                    | 28.13                 | 2.52   | 20.13                     | 15.36 | 1346    | 908.8 |

Figure S2a.  $^1\text{H}$  NMR of ternary-blended, melt-blown films of HE and LE films comparing with the solvent casted-films, showing zoom peaks at chemical shift of 3.4-3.8 ppm.

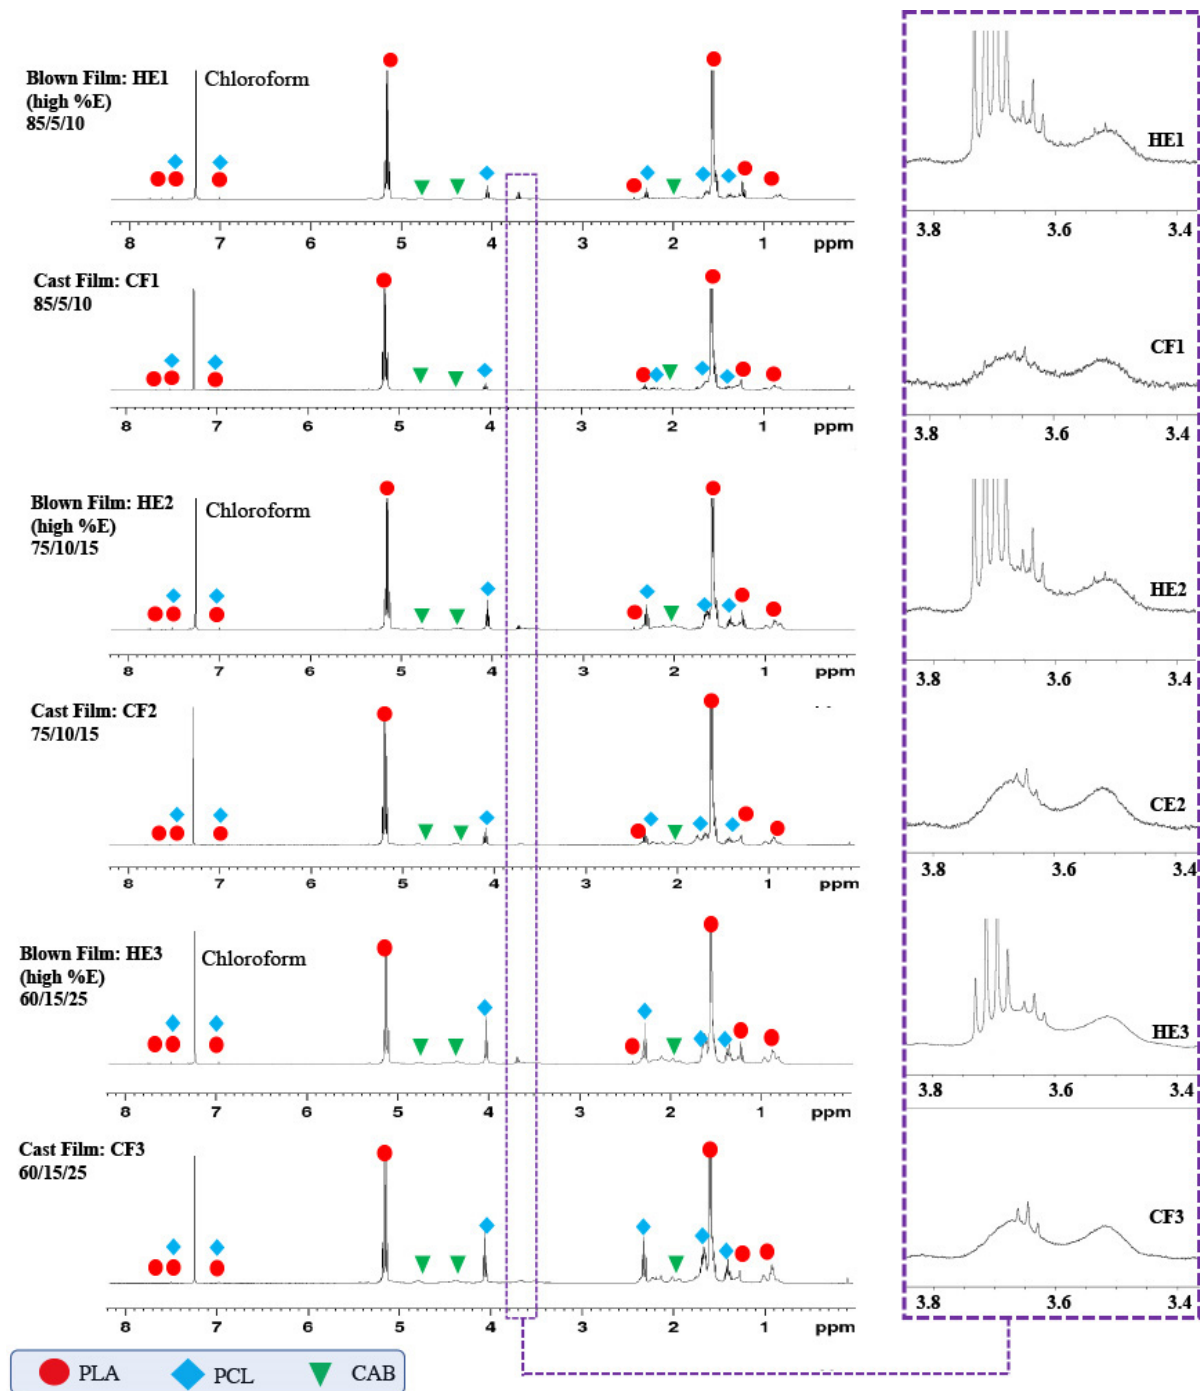

Figure S2b.  $^{13}\text{C}$  NMR of ternary-blended, melt-blown films of HE and LE films comparing with the solvent casted-films, showing zoom peaks at chemical shift of 58.4–58.8 ppm.

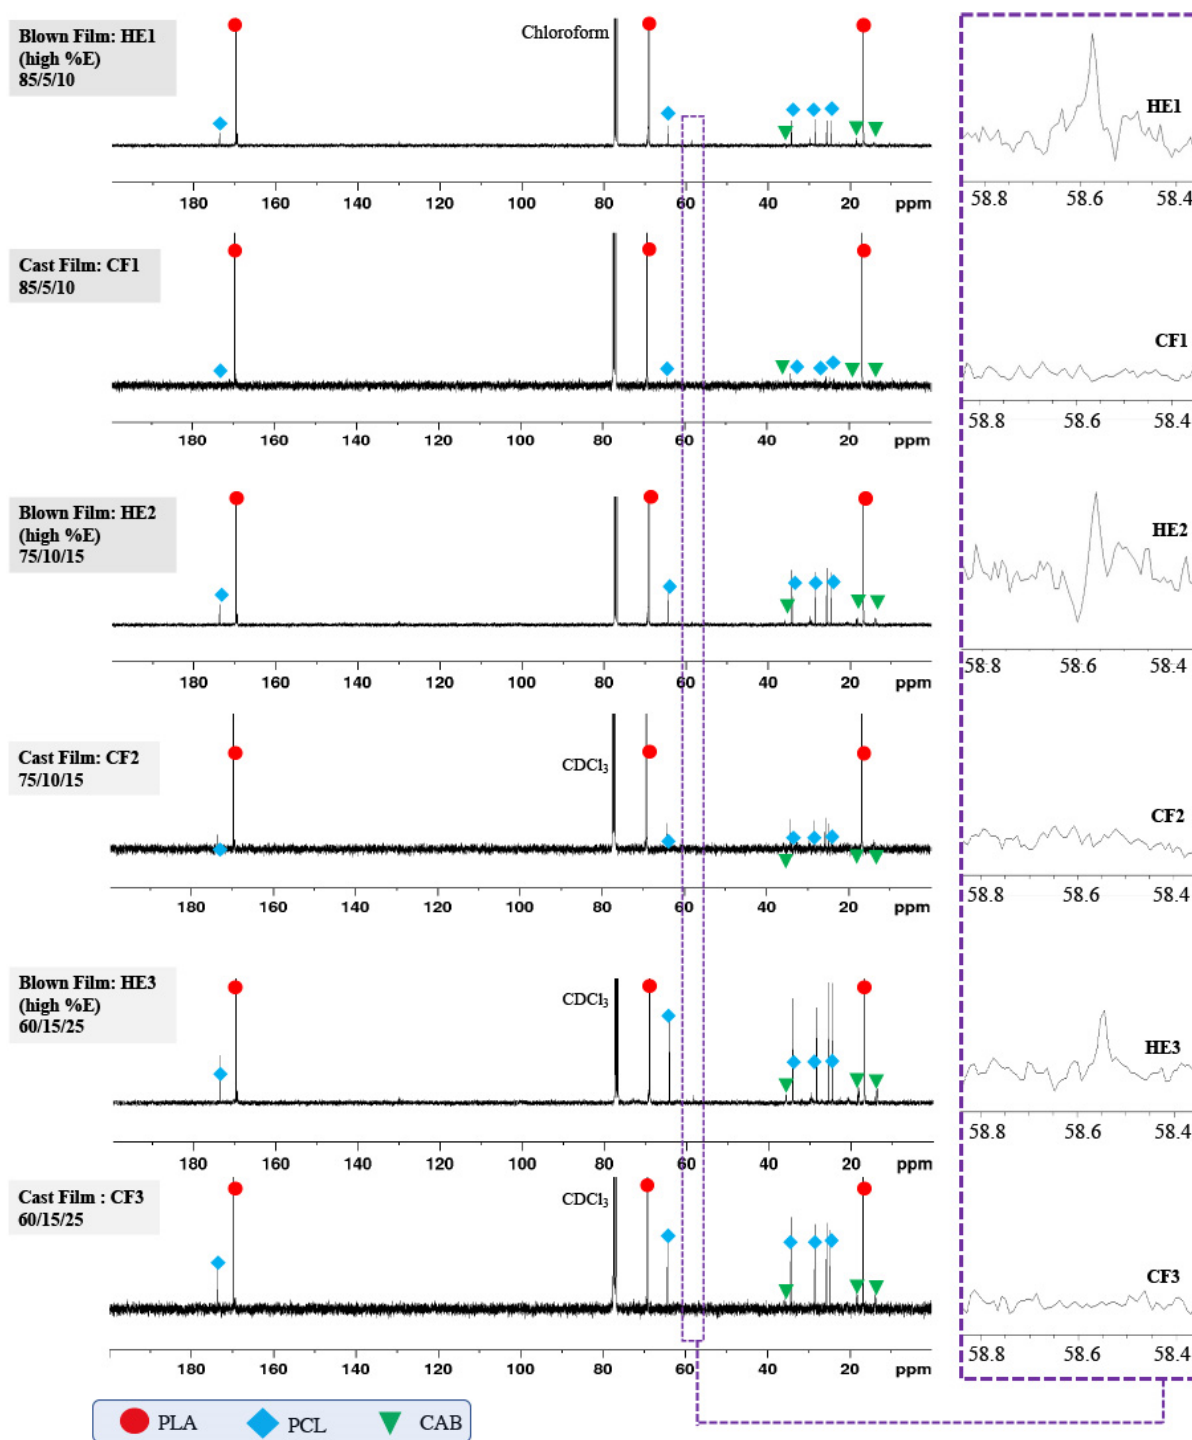

Supplement: s1 [file s1]
